# Supplementary material for: Introduction of a More Glutaredoxin-like Active Site to PDI Results in Competition between Protein Substrate and Glutathione Binding
Source: MDPI journal article supplement (doi:10.3390/antiox11101920), 2022-09-28
Supplement: s1 [file s1]

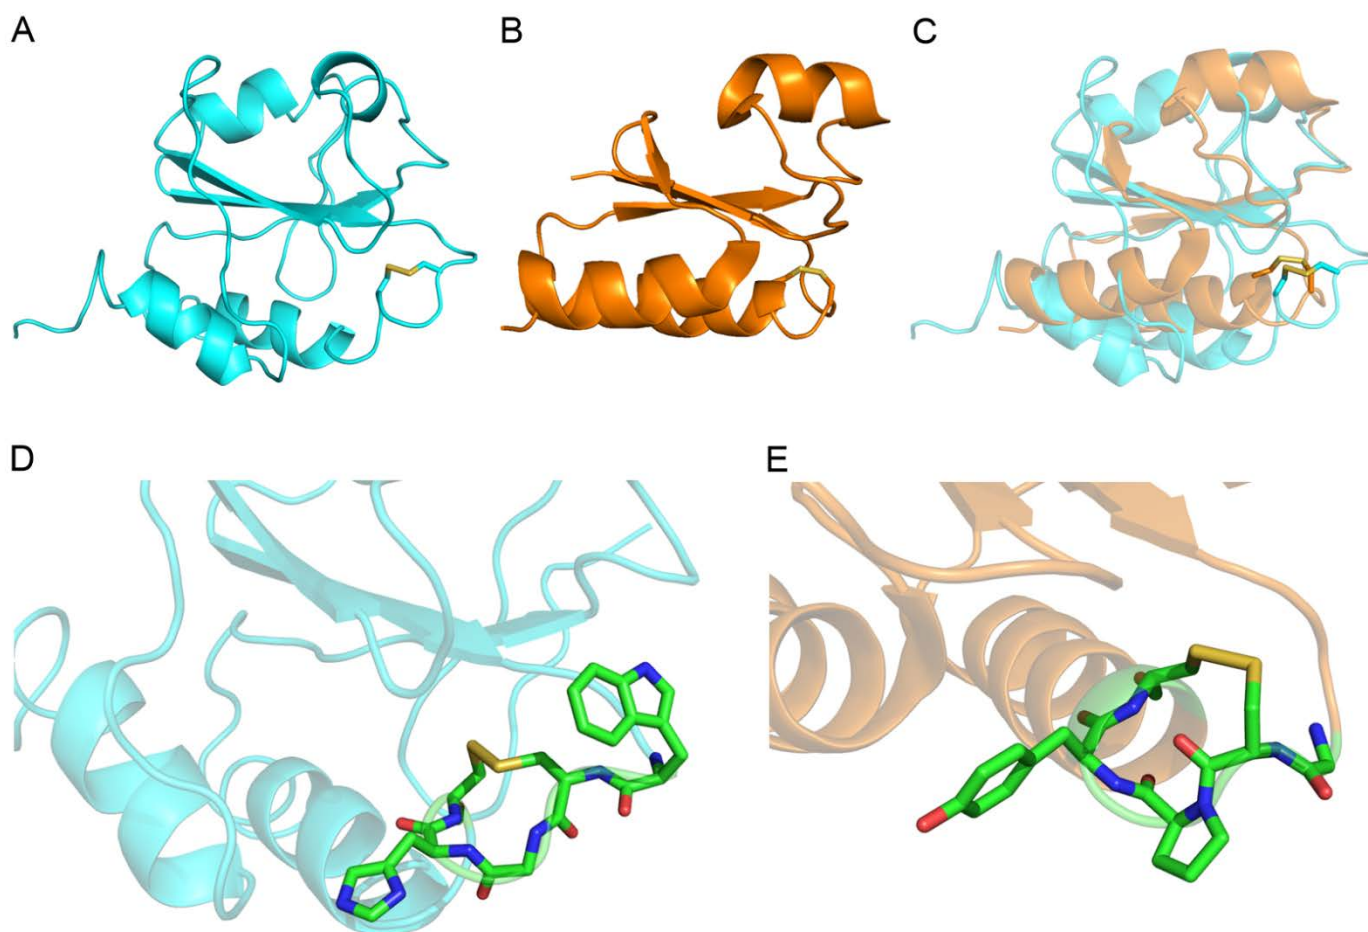

**Figure S1.** NMR Structures of human PDI and *E.coli* Grx1. NMR structures of (A) human PDI a domain (1MEK) and (B) *E.coli* Grx1 (1EGO). Panel (C) shows superimposition of the structures demonstrating the similarity of the thioredoxin fold structure found in both. The active sites of (D) human PDI a domain (WCGHC) and (E) *E.coli* Grx1 (GCPYC) differ from each other.

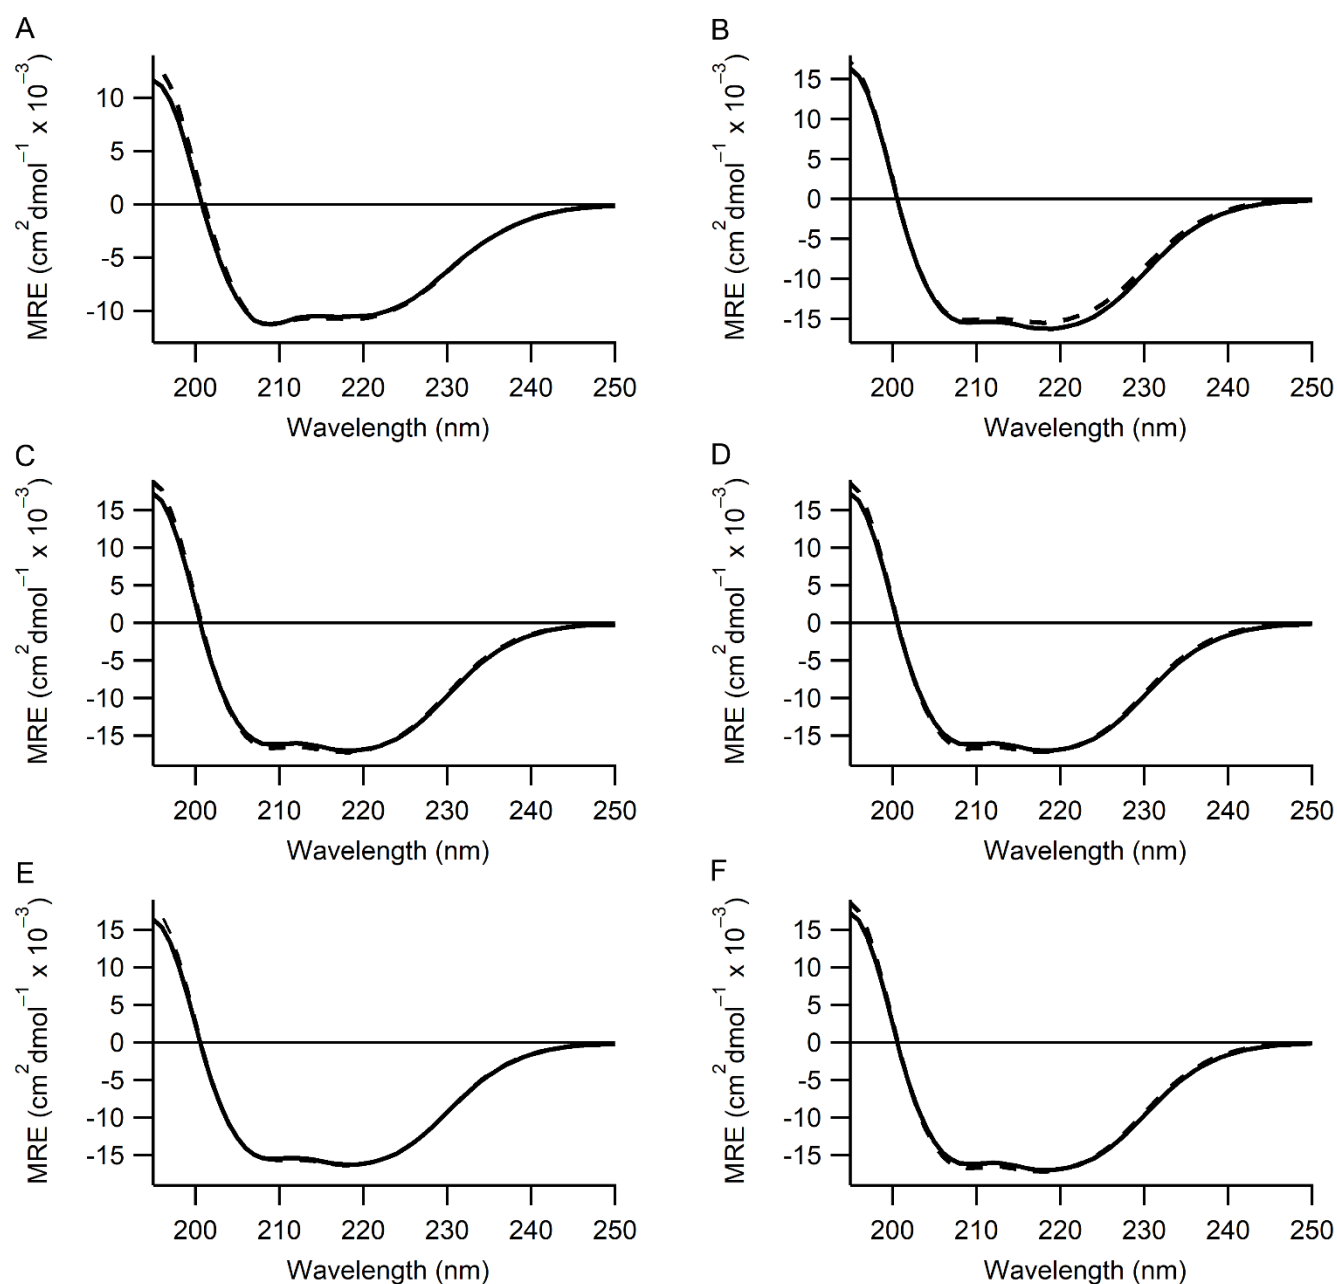

**Figure S2.** PDI variants have the same secondary structure as wild-type. Far UV CD spectra for (A) wild-type (solid line) and H55F H399F (dashed line) mature PDI, (B) wild-type (solid line) and H55F a domain of PDI, (C) wild-type (solid line) and G54N H55F (dashed line) a domain of PDI, (D) wild-type (solid line) and G54P H55F (dashed line) a domain of PDI, (E) wild-type (solid line) and G54Q H55F (dashed line) a domain of PDI and (F) wild-type (solid line) and G54S H55F (dashed line) a domain of PDI. Average traces of at least 3 separate CD spectroscopic scans are shown. MRE = mean residue ellipticity.

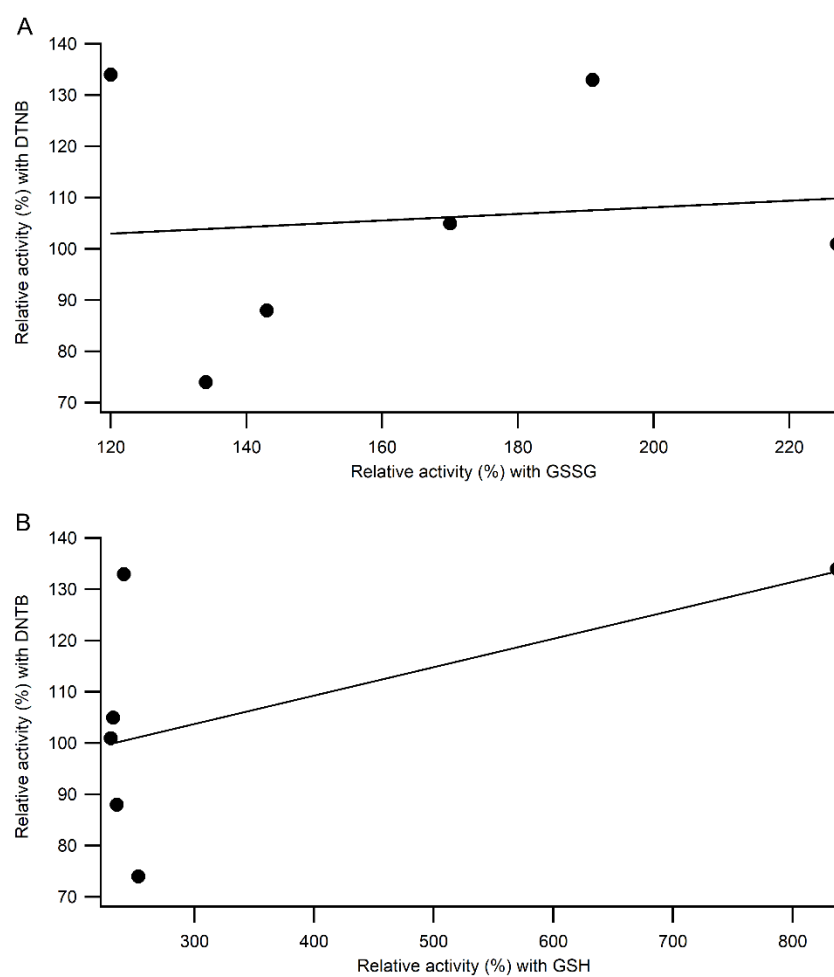

**Figure S3.** Correlation of relative activity of PDI a domain variants with DTNB and GSSG or GSH. No correlation was observed between relative activity of the PDI a domain active site variants with DTNB and GSSG (panel A,  $R^2 = 0.0114$ ) or GSH (Panel B,  $R^2 = 0.318$ ).
